# Supplementary material
Source: publisher site journal article supplement (https://www.dovepress.com/get_supplementary_file.php?f=270100.docx)
Supplement: Supplementary file 1 [file get_supplementary_file.php]

**Supplementary information**

**
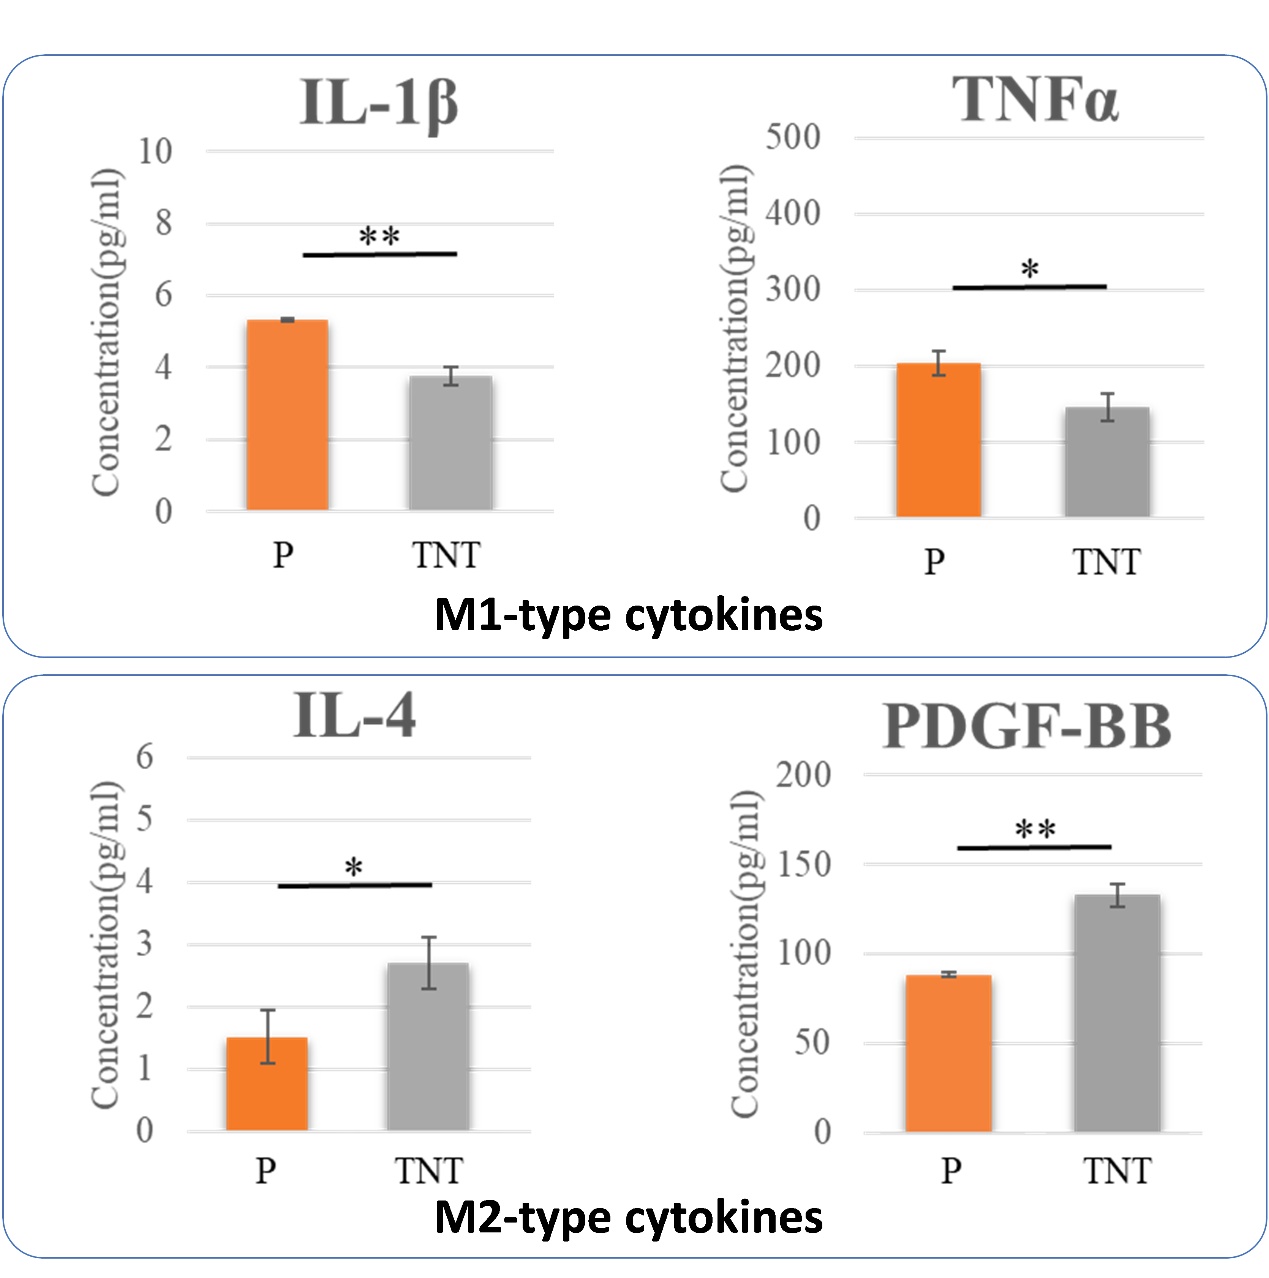
**

**Figure S1.** The cytokines measurements by ELISA. The RAW264.7 was cultured on two different surfaces for 7 days and the supernatants were collected for the measurements. *P<0.05, **P<0.01.


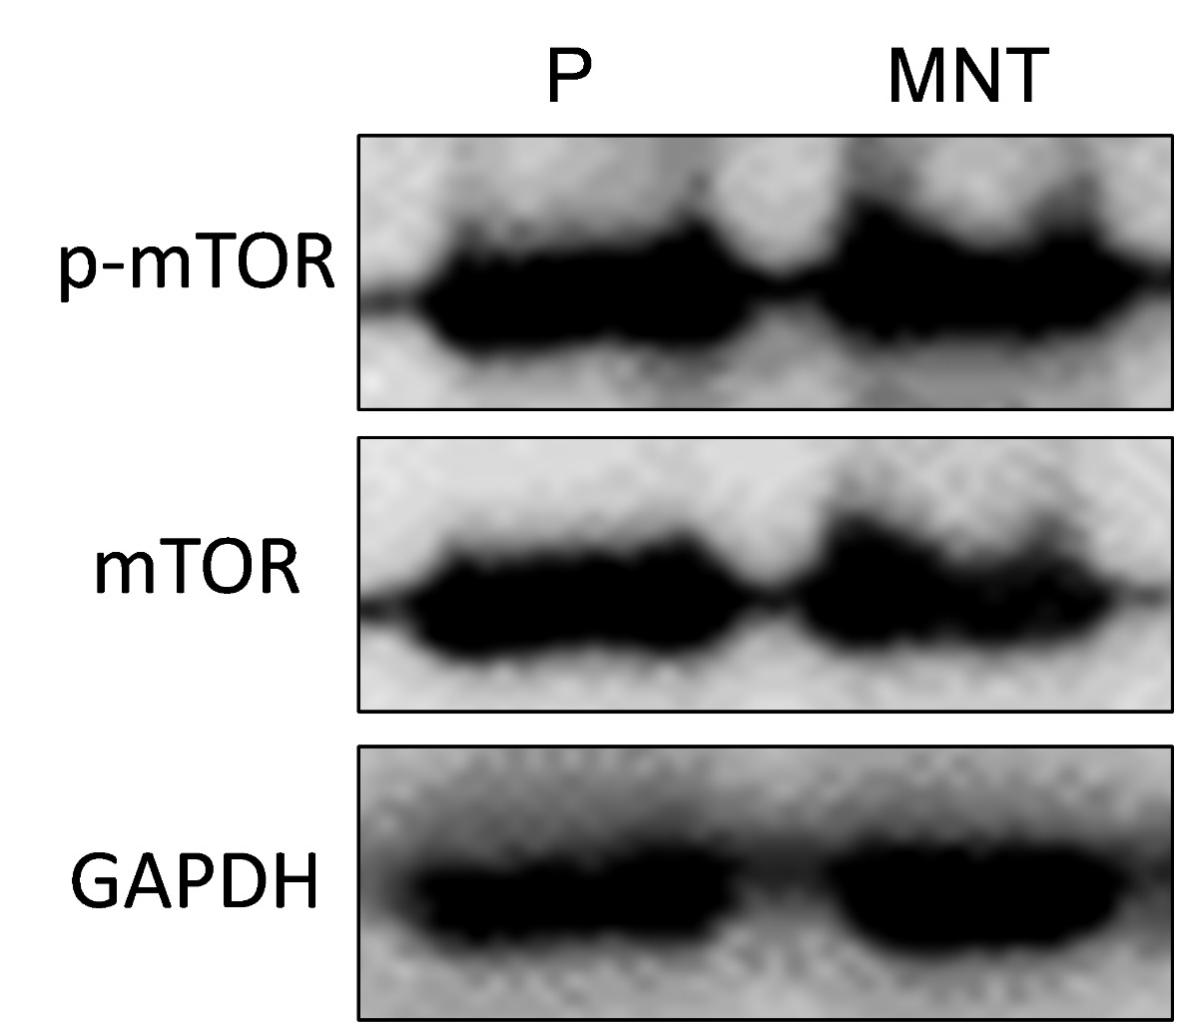


**Figure S2.** The western blot analysis of mTOR activity. The RAW264.7 was cultured on two different surface for 7 days and total protein was extracted for western blot analysis of both total and phosphorylation level of mTOR.
